# Supplementary material for: Colour and surface functional properties of wool fabrics coated with gallnut, feijoa skin, and mango seed kernel tannin-stabilised Ag nanoparticles
Source: Royal Society of Chemistry journal article supplement (doi:10.1039/d4ra00367e), 2024-01-01
Supplement: d4ra00367e1.pdf [file d4ra00367e1.pdf]

## Supplementary Information

# Colour and surface functional properties of wool fabrics coated with gallnut, feijoa skin, and mango seed kernel tannin-stabilised Ag nanoparticles

Mohammad Mahbulul Hassan<sup>\*ab</sup>, Tanushree Gupta<sup>c</sup>

### Index

**Fig. S1.** Optical images of wool fabric treated with 1.5% owf Ag NPs using GNT, FFST, and MSKT after 0, 10, and 20 washes.

**Fig. S2.** Elemental distribution of S and Ag elements on the surface of wool fabric treated with 1.5% owf Ag using TSC, GNT, FFST, and MSKT as a reducing and stabilizing agent.

**Fig. S3.** SEM micrographs of wool fabric treated with 0.5, 1.0, 1.5, and 2.0% Ag NPs at 50 °C for 2 h using an Ag to GNT ratio of 1:2.

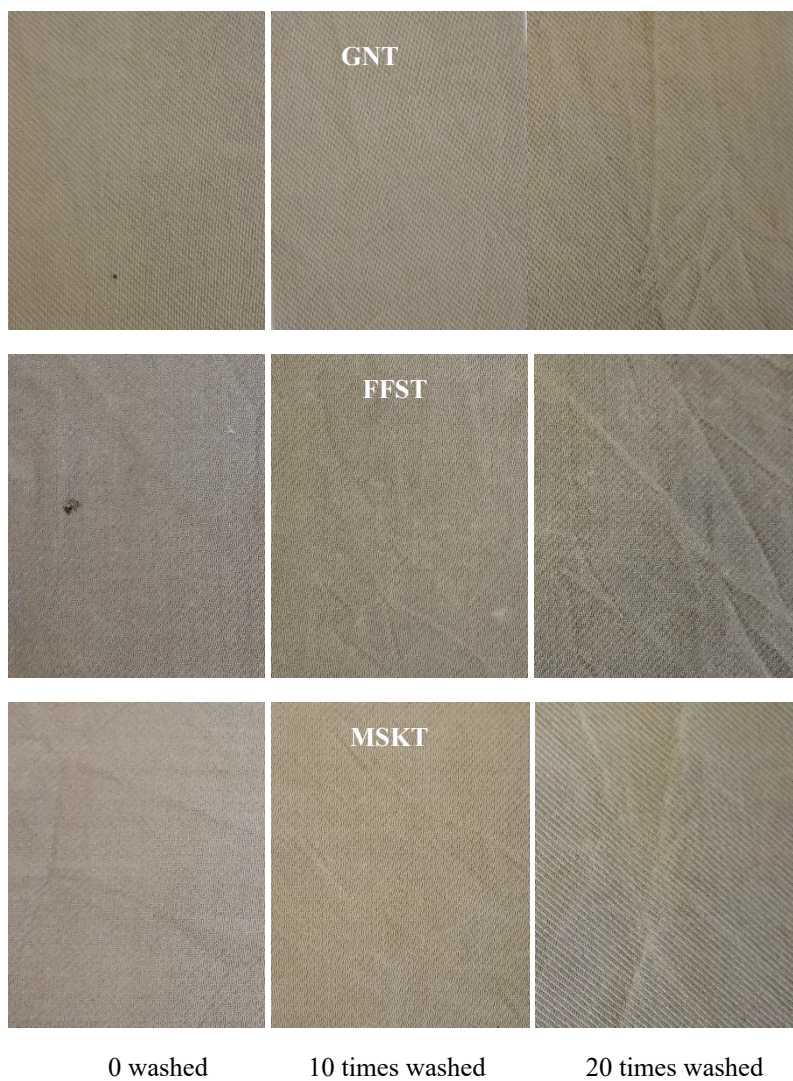

**Fig. S1.** Optical images of wool fabric treated with 1.5% owf Ag NPs using GNT, FFST, and MSKT after 0, 10, and 20 washes.

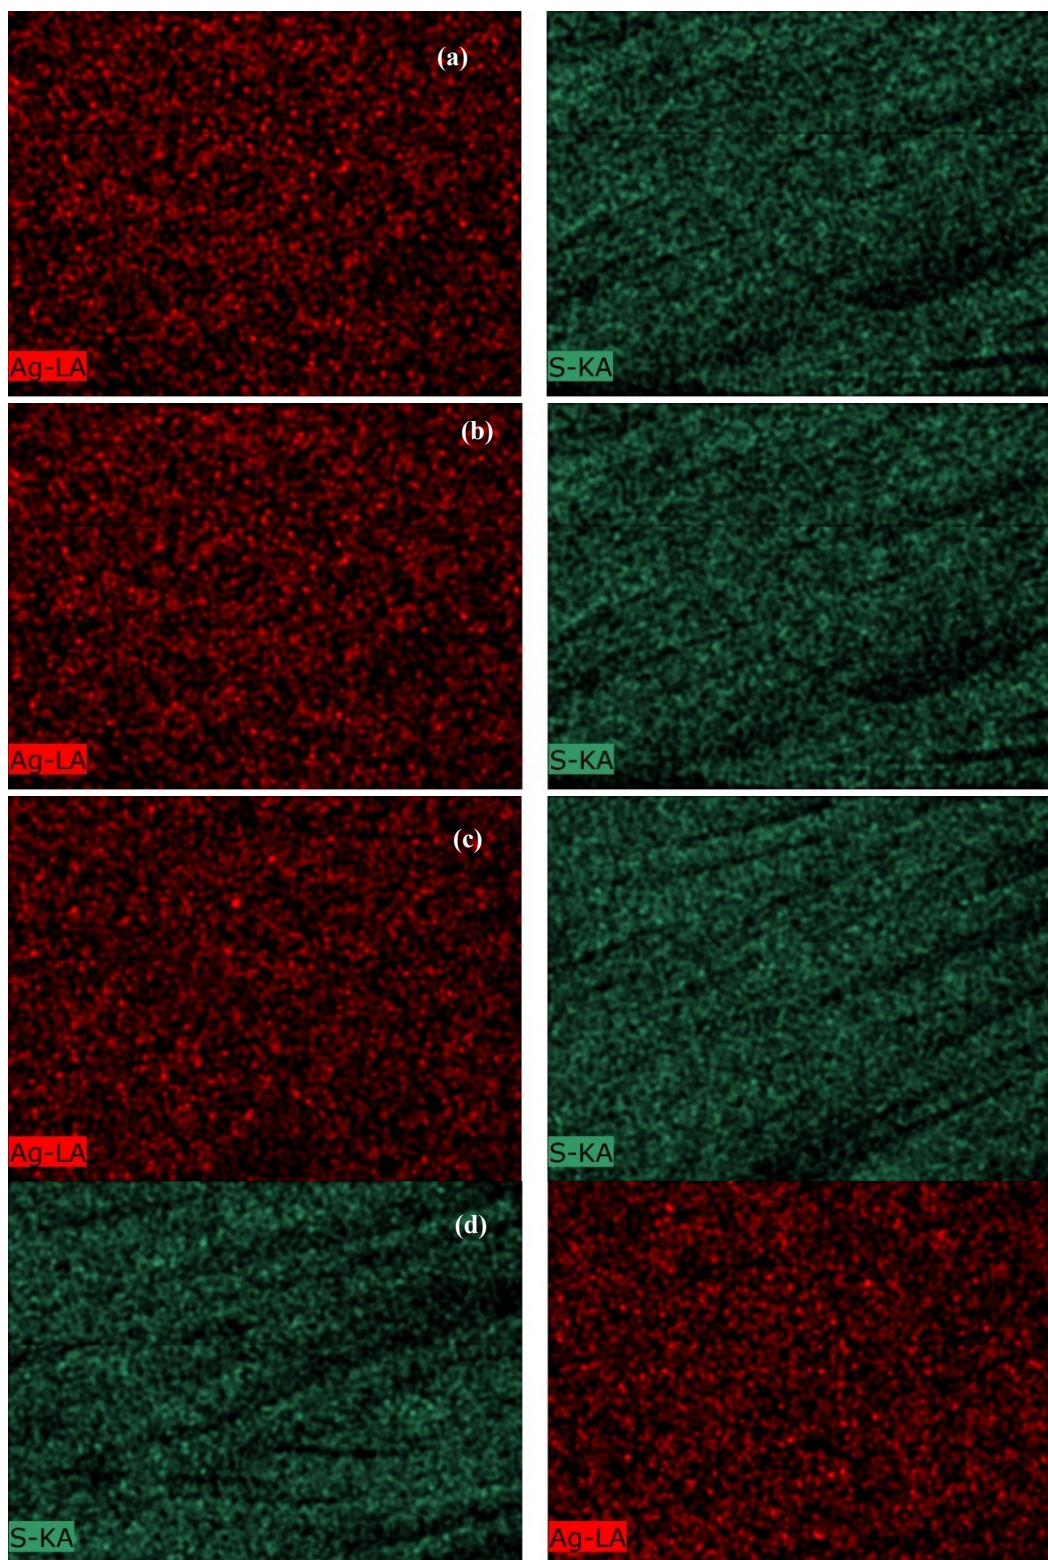

**Fig. S2.** Elemental distribution of S and Ag elements on the surface of wool fabric treated with 1.5% owf Ag using TSC (a), GNT (b), FFST (c), and MSKT (d) as a reducing and stabilizing agent.

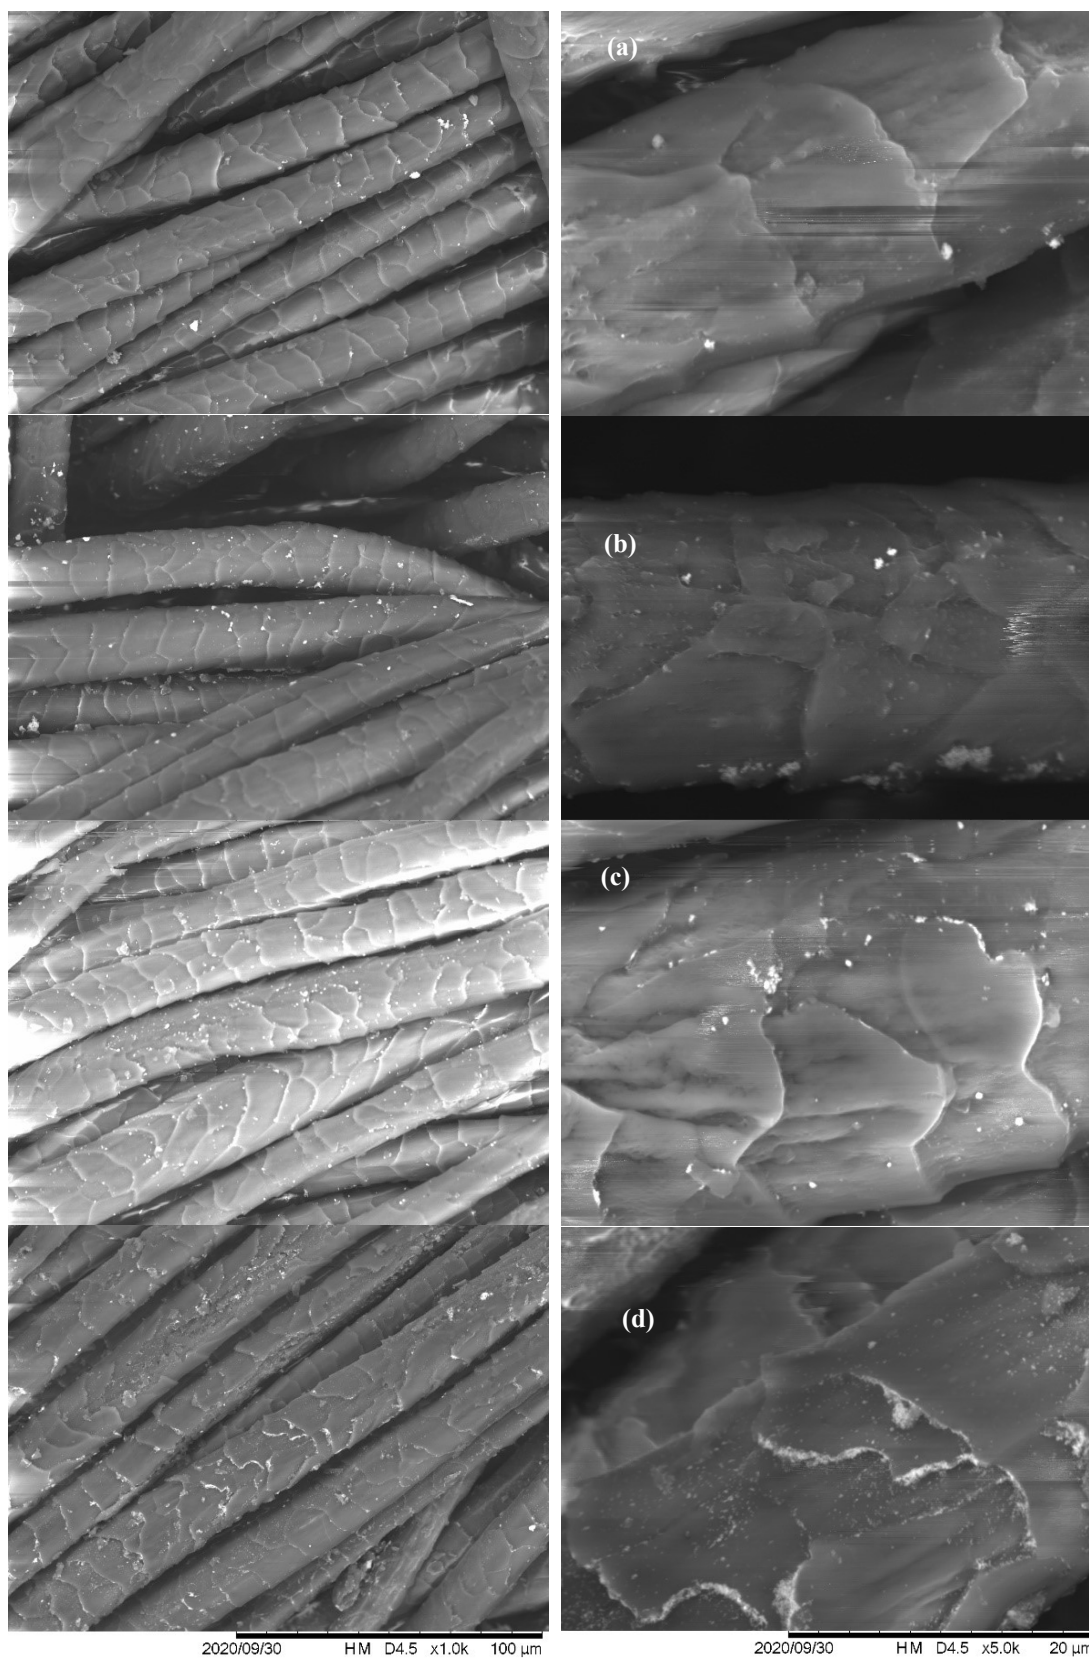

**Fig. S3.** SEM micrographs of wool fabric treated with 0.5 (a), 1.0 (b), 1.5 (c), and 2.0% (d) Ag NPs at 50 °C for 2 h using an Ag to GNT ratio of 1:2.
